# Supplementary material for: Impact of atrial fibrillation in patients with heart failure and reduced, mid-range or preserved ejection fraction
Source: PubMed Central journal article supplement — Heart. 2020 Apr 27;106(15):1160–8. doi: 10.1136/heartjnl-2019-316219 (PMC7398483; doi:10.1136/heartjnl-2019-316219), 2020-04-27
Supplement: heartjnl-2019-316219supp001.pdf [file heartjnl-2019-316219supp001.pdf]

**Supplementary file 1-1.** Multivariable hazards ratio for all-cause mortality associated with atrial fibrillation, according to ejection fraction group.

| Variable                                            | HF <sub>r</sub> EF  |         | HF <sub>mr</sub> EF |         | HF <sub>p</sub> EF  |         |
|-----------------------------------------------------|---------------------|---------|---------------------|---------|---------------------|---------|
|                                                     | HR (95% CI)         | P-value | HR (95% CI)         | P-value | HR (95% CI)         | P-value |
| <b>Atrial fibrillation</b>                          | 1.058 (0.926–1.207) | 0.408   | 1.098 (0.866–1.392) | 0.441   | 1.224 (1.024–1.463) | 0.026   |
| <b>Sex, male</b>                                    | 1.200 (1.043–1.381) | 0.011   | 1.484 (1.142–1.929) | 0.003   | 1.263 (1.013–1.575) | 0.038   |
| <b>Age, ≥80 yrs</b>                                 | 1.828 (1.607–2.079) | <0.001  | 1.995 (1.592–2.500) | <0.001  | 2.124 (1.784–2.530) | <0.001  |
| <b>NYHA functional class</b>                        |                     |         |                     |         |                     |         |
| III vs II                                           | 1.327 (1.094–1.609) | 0.004   | 0.819 (0.584–1.149) | 0.248   | 1.382 (1.061–1.800) | 0.016   |
| IV vs II                                            | 1.490 (1.234–1.798) | <0.001  | 0.977 (0.705–1.355) | 0.889   | 1.537 (1.185–1.992) | 0.001   |
| <b>Hypertension</b>                                 | 1.294 (1.145–1.464) | <0.001  | 0.908 (0.711–1.160) | 0.441   | 1.162 (0.954–1.416) | 0.136   |
| <b>Diabetes mellitus</b>                            | 1.223 (1.081–1.384) | 0.001   | 1.036 (0.808–1.327) | 0.782   | 1.217 (1.004–1.475) | 0.045   |
| <b>Ischemic heart disease</b>                       | 1.697 (1.482–1.944) | <0.001  | 1.227 (0.938–1.605) | 0.135   | 1.220 (0.995–1.494) | 0.056   |
| <b>Renal failure</b>                                | 1.412 (1.210–1.648) | <0.001  | 1.969 (1.446–2.682) | <0.001  | 1.553 (1.216–1.984) | <0.001  |
| <b>Cancer</b>                                       | 1.365 (1.147–1.625) | <0.001  | 1.254 (0.889–1.768) | 0.198   | 1.381 (1.048–1.819) | 0.022   |
| <b>Prior stroke</b>                                 | 1.355 (1.184–1.550) | <0.001  | 1.151 (0.883–1.501) | 0.299   | 1.494 (1.215–1.836) | <0.001  |
| <b>Heart rate</b>                                   | 0.997 (0.995–1.000) | 0.021   | 0.999 (0.994–1.003) | 0.511   | 1.000 (0.997–1.004) | 0.810   |
| <b>Systolic blood pressure</b>                      | 0.998 (0.995–1.000) | 0.094   | 0.997 (0.992–1.002) | 0.197   | 0.998 (0.994–1.002) | 0.257   |
| <b>diastolic blood pressure</b>                     | 0.995 (0.991–1.000) | 0.047   | 1.002 (0.994–1.011) | 0.586   | 1.003 (0.997–1.009) | 0.338   |
| <b>Body mass index</b>                              | 0.941 (0.926–0.957) | <0.001  | 0.948 (0.918–0.979) | 0.001   | 0.945 (0.924–0.966) | <0.001  |
| <b>White blood cells</b>                            | 1.015 (1.001–1.029) | 0.030   | 1.030 (1.004–1.056) | 0.025   | 1.003 (0.979–1.027) | 0.812   |
| <b>HbA1c</b>                                        | 0.979 (0.962–0.996) | 0.013   | 1.000 (0.966–1.034) | 0.991   | 0.981 (0.954–1.009) | 0.184   |
| <b>Potassium</b>                                    | 0.978 (0.906–1.056) | 0.565   | 0.889 (0.763–1.035) | 0.129   | 1.066 (0.941–1.207) | 0.314   |
| <b>Sodium ≥135 mmol/L</b>                           | 0.809 (0.715–0.915) | 0.001   | 0.763 (0.600–0.969) | 0.026   | 0.855 (0.708–1.032) | 0.103   |
| <b>Hemoglobin ≥12 g/dL</b>                          | 0.760 (0.674–0.856) | <0.001  | 0.629 (0.493–0.802) | <0.001  | 0.663 (0.557–0.790) | <0.001  |
| <b>Blood urea nitrogen ≥26 mg/dL</b>                | 1.194 (1.049–1.360) | 0.007   | 1.107 (0.860–1.423) | 0.431   | 1.421 (1.163–1.737) | 0.001   |
| <b>Creatinine ≥2 mg/dL</b>                          | 0.957 (0.799–1.147) | 0.637   | 1.044 (0.738–1.477) | 0.808   | 0.765 (0.564–1.037) | 0.085   |
| <b>BNP &gt;900 pg/mL or NTproBNP &gt;5000 pg/mL</b> | 1.371 (1.212–1.551) | <0.001  | 1.251 (0.996–1.572) | 0.054   | 1.360 (1.138–1.626) | 0.001   |
| <b>ACEI or ARB</b>                                  | 0.722 (0.634–0.822) | <0.001  | 0.968 (0.769–1.219) | 0.785   | 0.884 (0.745–1.049) | 0.159   |
| <b>Beta-blockers</b>                                | 0.748 (0.669–0.837) | <0.001  | 0.862 (0.691–1.076) | 0.189   | 0.921 (0.779–1.088) | 0.332   |
| <b>Aldosterone antagonist</b>                       | 0.995 (0.887–1.117) | 0.936   | 1.201 (0.971–1.487) | 0.092   | 0.984 (0.833–1.161) | 0.846   |
| <b>Nitrate</b>                                      | 0.926 (0.826–1.039) | 0.190   | 1.029 (0.827–1.280) | 0.801   | 0.914 (0.772–1.081) | 0.292   |
| <b>Diuretic</b>                                     | 1.178 (0.894–1.552) | 0.245   | 1.579 (0.988–2.524) | 0.056   | 1.052 (0.740–1.496) | 0.777   |

|                            |                     |       |                     |        |                     |       |
|----------------------------|---------------------|-------|---------------------|--------|---------------------|-------|
| <b>Anticoagulant</b>       | 1.029 (0.917–1.154) | 0.627 | 1.019 (0.818–1.271) | 0.864  | 0.814 (0.686–0.966) | 0.018 |
| <b>Antiplatelet</b>        | 0.936 (0.816–1.074) | 0.348 | 0.833 (0.644–1.078) | 0.164  | 0.866 (0.722–1.039) | 0.121 |
| <b>Statin</b>              | 0.851 (0.755–0.959) | 0.008 | 0.689 (0.541–0.878) | 0.003  | 0.747 (0.618–0.902) | 0.002 |
| <b>Smoking status</b>      |                     |       |                     |        |                     |       |
| Ex vs current              | 1.211 (1.023–1.433) | 0.026 | 1.257 (0.841–1.878) | 0.265  | 1.389 (0.999–1.930) | 0.051 |
| Never vs current           | 1.037 (0.868–1.239) | 0.690 | 1.027 (0.697–1.515) | 0.892  | 1.166 (0.835–1.628) | 0.366 |
| <b>Alcohol consumption</b> |                     |       |                     |        |                     |       |
| Social vs heavy            | 1.043 (0.810–1.342) | 0.746 | 2.321 (1.180–4.567) | 0.015  | 0.936 (0.638–1.371) | 0.733 |
| Never vs heavy             | 1.354 (1.043–1.757) | 0.023 | 3.322 (1.693–6.519) | <0.001 | 1.084 (0.736–1.598) | 0.683 |

ACEI, Angiotensin-converting enzyme inhibitor; ARB, Angiotensin receptor blockers; BNP, brain natriuretic peptide; NT-proBNP, N-terminal prohormone of brain natriuretic peptide; EF, ejection fraction; HFrEF, heart failure with reduced ejection fraction; HFmrEF, heart failure with mid-range ejection fraction; HFpEF, heart failure with preserved ejection fraction; HR, hazard ratio; NYHA, New York Heart Association.
