# Supplementary material for: Impact of atrial fibrillation in patients with heart failure and reduced, mid-range or preserved ejection fraction
Source: PubMed Central journal article supplement — Heart. 2020 Apr 27;106(15):1160–8. doi: 10.1136/heartjnl-2019-316219 (PMC7398483; doi:10.1136/heartjnl-2019-316219), 2020-04-27
Supplement: heartjnl-2019-316219supp002.pdf [file heartjnl-2019-316219supp002.pdf]

**Supplementary file 1-2.** Multivariable hazards ratio for the composite of all-cause mortality and rehospitalization associated with atrial fibrillation, according to ejection fraction groups.

| Variable                                            | HFrfEF              |         | HFmrEF              |         | HFpEF               |         |
|-----------------------------------------------------|---------------------|---------|---------------------|---------|---------------------|---------|
|                                                     | HR (95% CI)         | P-value | HR (95% CI)         | P-value | HR (95% CI)         | P-value |
| <b>Atrial fibrillation</b>                          | 0.967 (0.871–1.074) | 0.535   | 1.135 (0.931–1.382) | 0.210   | 1.027 (0.884–1.194) | 0.724   |
| <b>Sex, male</b>                                    | 1.082 (0.965–1.212) | 0.176   | 0.966 (0.777–1.201) | 0.756   | 1.147 (0.959–1.371) | 0.134   |
| <b>Age, ≥80 yrs</b>                                 | 1.233 (1.101–1.380) | <0.001  | 1.355 (1.114–1.647) | 0.002   | 1.214 (1.048–1.408) | 0.010   |
| <b>NYHA functional class</b>                        |                     |         |                     |         |                     |         |
| III vs II                                           | 1.378 (1.194–1.591) | <0.001  | 0.931 (0.714–1.215) | 0.599   | 1.369 (1.122–1.670) | 0.002   |
| IV vs II                                            | 1.414 (1.227–1.630) | <0.001  | 1.071 (0.824–1.392) | 0.607   | 1.404 (1.152–1.711) | 0.001   |
| <b>Hypertension</b>                                 | 1.160 (1.055–1.275) | 0.002   | 0.998 (0.814–1.224) | 0.988   | 0.983 (0.840–1.150) | 0.829   |
| <b>Diabetes mellitus</b>                            | 1.153 (1.042–1.276) | 0.006   | 1.000 (0.813–1.230) | 1.000   | 1.225 (1.043–1.439) | 0.013   |
| <b>Ischemic heart disease</b>                       | 1.285 (1.154–1.431) | <0.001  | 1.611 (1.275–2.034) | <0.001  | 1.190 (1.002–1.413) | 0.048   |
| <b>Renal failure</b>                                | 1.404 (1.234–1.598) | <0.001  | 1.510 (1.153–1.978) | 0.003   | 1.331 (1.076–1.646) | 0.008   |
| <b>Cancer</b>                                       | 1.224 (1.058–1.416) | 0.007   | 1.339 (1.006–1.781) | 0.045   | 1.420 (1.121–1.799) | 0.004   |
| <b>Prior stroke</b>                                 | 1.087 (0.966–1.222) | 0.166   | 1.224 (0.985–1.520) | 0.068   | 1.320 (1.104–1.579) | 0.002   |
| <b>Heart rate</b>                                   | 0.999 (0.997–1.000) | 0.142   | 0.998 (0.994–1.002) | 0.266   | 1.000 (0.997–1.003) | 0.920   |
| <b>Systolic blood pressure</b>                      | 1.001 (0.998–1.003) | 0.502   | 1.000 (0.996–1.004) | 0.840   | 1.000 (0.997–1.004) | 0.804   |
| <b>diastolic blood pressure</b>                     | 0.993 (0.990–0.997) | <0.001  | 1.000 (0.993–1.006) | 0.907   | 1.001 (0.995–1.006) | 0.816   |
| <b>Body mass index</b>                              | 0.976 (0.964–0.988) | <0.001  | 0.998 (0.975–1.022) | 0.882   | 0.986 (0.969–1.003) | 0.105   |
| <b>White blood cells</b>                            | 0.996 (0.985–1.008) | 0.536   | 1.004 (0.983–1.026) | 0.711   | 0.975 (0.955–0.996) | 0.019   |
| <b>HbA1c</b>                                        | 0.983 (0.970–0.997) | 0.016   | 0.994 (0.967–1.022) | 0.680   | 0.985 (0.963–1.008) | 0.201   |
| <b>Potassium</b>                                    | 1.004 (0.942–1.071) | 0.897   | 0.876 (0.769–0.997) | 0.045   | 1.101 (0.993–1.220) | 0.068   |
| <b>Sodium ≥135 mmol/L</b>                           | 0.884 (0.797–0.980) | 0.019   | 0.828 (0.671–1.022) | 0.080   | 0.950 (0.806–1.120) | 0.541   |
| <b>Hemoglobin ≥12 g/dL</b>                          | 0.879 (0.798–0.970) | 0.010   | 0.837 (0.691–1.014) | 0.069   | 0.829 (0.719–0.955) | 0.010   |
| <b>Blood urea nitrogen ≥26 mg/dL</b>                | 1.143 (1.029–1.269) | 0.013   | 1.110 (0.894–1.377) | 0.345   | 1.342 (1.128–1.598) | 0.001   |
| <b>Creatinine ≥2 mg/dL</b>                          | 1.035 (0.884–1.211) | 0.670   | 1.215 (0.885–1.667) | 0.229   | 0.859 (0.649–1.135) | 0.284   |
| <b>BNP &gt;900 pg/mL or NTproBNP &gt;5000 pg/mL</b> | 1.123 (1.022–1.234) | 0.015   | 1.208 (1.005–1.452) | 0.044   | 1.135 (0.974–1.322) | 0.105   |
| <b>ACEI or ARB</b>                                  | 0.736 (0.660–0.821) | <0.001  | 0.929 (0.770–1.121) | 0.442   | 0.885 (0.770–1.018) | 0.086   |
| <b>Beta-blockers</b>                                | 0.792 (0.723–0.868) | <0.001  | 0.806 (0.667–0.972) | 0.024   | 0.877 (0.765–1.005) | 0.058   |
| <b>Aldosterone antagonist</b>                       | 1.075 (0.979–1.179) | 0.128   | 1.012 (0.852–1.201) | 0.894   | 1.092 (0.951–1.253) | 0.214   |
| <b>Nitrate</b>                                      | 0.948 (0.867–1.038) | 0.251   | 0.971 (0.812–1.161) | 0.745   | 1.005 (0.875–1.154) | 0.944   |

|                            |                     |       |                     |       |                     |       |
|----------------------------|---------------------|-------|---------------------|-------|---------------------|-------|
| <b>Diuretic</b>            | 1.030 (0.832–1.275) | 0.788 | 1.284 (0.923–1.787) | 0.138 | 0.869 (0.672–1.125) | 0.287 |
| <b>Anticoagulant</b>       | 1.034 (0.943–1.135) | 0.475 | 1.084 (0.902–1.303) | 0.389 | 0.952 (0.826–1.096) | 0.491 |
| <b>Antiplatelet</b>        | 0.984 (0.884–1.096) | 0.773 | 0.846 (0.682–1.048) | 0.125 | 0.936 (0.806–1.087) | 0.385 |
| <b>Statin</b>              | 0.933 (0.849–1.027) | 0.158 | 0.755 (0.616–0.926) | 0.007 | 0.862 (0.734–1.011) | 0.068 |
| <b>Smoking status</b>      |                     |       |                     |       |                     |       |
| Ex vs current              | 1.075 (0.945–1.224) | 0.270 | 1.244 (0.899–1.720) | 0.187 | 1.226 (0.940–1.598) | 0.133 |
| Never vs current           | 1.075 (0.939–1.232) | 0.295 | 1.106 (0.811–1.510) | 0.525 | 1.291 (1.000–1.668) | 0.050 |
| <b>Alcohol consumption</b> |                     |       |                     |       |                     |       |
| Social vs heavy            | 1.019 (0.854–1.214) | 0.838 | 1.505 (0.956–2.371) | 0.078 | 1.265 (0.920–1.739) | 0.148 |
| Never vs heavy             | 1.079 (0.896–1.301) | 0.423 | 1.615 (1.027–2.538) | 0.038 | 1.267 (0.921–1.743) | 0.146 |

ACEI, Angiotensin-converting enzyme inhibitor; ARB, Angiotensin receptor blockers; BNP, brain natriuretic peptide; NT-proBNP, N-terminal prohormone of brain natriuretic peptide; EF, ejection fraction; HF<sub>r</sub>EF, heart failure with reduced ejection fraction; HF<sub>mr</sub>EF, heart failure with mid-range ejection fraction; HF<sub>p</sub>EF, heart failure with preserved ejection fraction; HR, hazard ratio; NYHA, New York Heart Association.
