# Supplementary material for: Impact of atrial fibrillation in patients with heart failure and reduced, mid-range or preserved ejection fraction
Source: PubMed Central journal article supplement — Heart. 2020 Apr 27;106(15):1160–8. doi: 10.1136/heartjnl-2019-316219 (PMC7398483; doi:10.1136/heartjnl-2019-316219), 2020-04-27
Supplement: heartjnl-2019-316219supp003.pdf [file heartjnl-2019-316219supp003.pdf]

**Supplementary file 1-3.** Multivariable hazards ratio for CVD mortality associated with atrial fibrillation, according to ejection fraction groups.

| Variable                                            | HF <sub>r</sub> EF  |         | HF <sub>mr</sub> EF |         | HF <sub>p</sub> EF  |         |
|-----------------------------------------------------|---------------------|---------|---------------------|---------|---------------------|---------|
|                                                     | HR (95% CI)         | P-value | HR (95% CI)         | P-value | HR (95% CI)         | P-value |
| <b>Atrial fibrillation</b>                          | 0.908 (0.716–1.150) | 0.423   | 1.060 (0.660–1.702) | 0.808   | 1.554 (1.063–2.272) | 0.023   |
| <b>Sex, male</b>                                    | 1.096 (0.854–1.407) | 0.471   | 1.106 (0.644–1.900) | 0.715   | 1.465 (0.932–2.304) | 0.098   |
| <b>Age, ≥80 yrs</b>                                 | 1.523 (1.206–1.924) | 0.000   | 2.047 (1.304–3.214) | 0.002   | 1.986 (1.370–2.879) | 0.000   |
| <b>NYHA functional class</b>                        |                     |         |                     |         |                     |         |
| III vs II                                           | 1.641 (1.131–2.379) | 0.009   | 0.932 (0.401–2.162) | 0.869   | 1.482 (0.800–2.744) | 0.211   |
| IV vs II                                            | 1.841 (1.279–2.652) | 0.001   | 1.799 (0.813–3.984) | 0.147   | 2.167 (1.195–3.931) | 0.011   |
| <b>Hypertension</b>                                 | 1.432 (1.152–1.780) | 0.001   | 1.099 (0.656–1.840) | 0.720   | 1.390 (0.905–2.133) | 0.133   |
| <b>Diabetes mellitus</b>                            | 0.997 (0.800–1.242) | 0.976   | 0.867 (0.529–1.420) | 0.570   | 0.978 (0.648–1.477) | 0.916   |
| <b>Ischemic heart disease</b>                       | 1.767 (1.386–2.253) | 0.000   | 1.528 (0.877–2.661) | 0.134   | 1.251 (0.813–1.926) | 0.309   |
| <b>Renal failure</b>                                | 1.926 (1.488–2.493) | 0.000   | 2.597 (1.469–4.592) | 0.001   | 2.981 (1.892–4.694) | 0.000   |
| <b>Cancer</b>                                       | 0.937 (0.665–1.321) | 0.711   | 1.292 (0.623–2.679) | 0.491   | 1.320 (0.724–2.407) | 0.365   |
| <b>Prior stroke</b>                                 | 1.119 (0.871–1.437) | 0.378   | 0.771 (0.428–1.388) | 0.386   | 1.846 (1.233–2.764) | 0.003   |
| <b>Heart rate</b>                                   | 0.997 (0.993–1.001) | 0.159   | 1.000 (0.991–1.009) | 0.983   | 1.003 (0.996–1.010) | 0.436   |
| <b>Systolic blood pressure</b>                      | 0.994 (0.988–0.999) | 0.021   | 0.993 (0.983–1.003) | 0.184   | 1.000 (0.993–1.008) | 0.924   |
| <b>diastolic blood pressure</b>                     | 0.990 (0.982–0.999) | 0.024   | 0.994 (0.978–1.011) | 0.505   | 0.999 (0.986–1.012) | 0.915   |
| <b>Body mass index</b>                              | 0.952 (0.924–0.981) | 0.001   | 1.008 (0.946–1.074) | 0.804   | 0.934 (0.890–0.98)  | 0.006   |
| <b>White blood cells</b>                            | 1.021 (0.998–1.044) | 0.077   | 0.997 (0.943–1.054) | 0.910   | 1.046 (1.000–1.095) | 0.050   |
| <b>HbA1c</b>                                        | 0.957 (0.928–0.987) | 0.005   | 1.026 (0.959–1.099) | 0.452   | 0.972 (0.916–1.032) | 0.358   |
| <b>Potassium</b>                                    | 0.926 (0.812–1.056) | 0.253   | 0.773 (0.575–1.039) | 0.087   | 1.236 (0.963–1.587) | 0.097   |
| <b>Sodium ≥135 mmol/L</b>                           | 0.599 (0.488–0.735) | 0.000   | 0.700 (0.436–1.125) | 0.141   | 0.878 (0.594–1.299) | 0.515   |
| <b>Hemoglobin ≥12 g/dL</b>                          | 0.861 (0.696–1.065) | 0.167   | 0.769 (0.461–1.284) | 0.316   | 0.781 (0.540–1.130) | 0.190   |
| <b>Blood urea nitrogen ≥26 mg/dL</b>                | 1.153 (0.913–1.456) | 0.233   | 1.612 (0.984–2.641) | 0.058   | 1.422 (0.939–2.152) | 0.096   |
| <b>Creatinine ≥2 mg/dL</b>                          | 0.789 (0.589–1.056) | 0.111   | 0.819 (0.425–1.579) | 0.551   | 0.358 (0.197–0.651) | 0.001   |
| <b>BNP &gt;900 pg/mL or NTproBNP &gt;5000 pg/mL</b> | 1.546 (1.231–1.942) | 0.000   | 1.248 (0.782–1.993) | 0.353   | 1.397 (0.964–2.024) | 0.078   |
| <b>ACEI or ARB</b>                                  | 0.557 (0.450–0.690) | 0.000   | 1.084 (0.671–1.752) | 0.741   | 0.905 (0.630–1.300) | 0.589   |
| <b>Beta-blockers</b>                                | 0.741 (0.607–0.905) | 0.003   | 0.628 (0.398–0.989) | 0.045   | 0.683 (0.479–0.975) | 0.036   |
| <b>Aldosterone antagonist</b>                       | 0.769 (0.626–0.944) | 0.012   | 1.711 (1.098–2.668) | 0.018   | 0.893 (0.629–1.268) | 0.529   |
| <b>Nitrate</b>                                      | 0.826 (0.675–1.011) | 0.064   | 1.358 (0.839–2.200) | 0.213   | 0.774 (0.543–1.102) | 0.156   |
| <b>Diuretic</b>                                     | 1.215 (0.751–1.966) | 0.427   | 0.785 (0.338–1.820) | 0.572   | 0.597 (0.311–1.144) | 0.120   |

|                            |                     |       |                      |       |                     |       |
|----------------------------|---------------------|-------|----------------------|-------|---------------------|-------|
| <b>Anticoagulant</b>       | 1.102 (0.897–1.353) | 0.354 | 1.190 (0.748–1.892)  | 0.462 | 1.014 (0.704–1.461) | 0.941 |
| <b>Antiplatelet</b>        | 0.889 (0.697–1.134) | 0.343 | 1.081 (0.625–1.869)  | 0.781 | 0.788 (0.537–1.157) | 0.224 |
| <b>Statin</b>              | 0.815 (0.660–1.006) | 0.057 | 0.536 (0.329–0.875)  | 0.013 | 0.867 (0.584–1.288) | 0.480 |
| <b>Smoking status</b>      |                     |       |                      |       |                     |       |
| Ex vs current              | 1.102 (0.824–1.476) | 0.512 | 1.083 (0.443–2.650)  | 0.861 | 0.998 (0.497–2.006) | 0.997 |
| Never vs current           | 0.887 (0.651–1.209) | 0.449 | 0.908 (0.386–2.134)  | 0.824 | 1.097 (0.557–2.159) | 0.789 |
| <b>Alcohol consumption</b> |                     |       |                      |       |                     |       |
| Social vs heavy            | 1.563 (0.951–2.571) | 0.078 | 5.944 (0.772–45.791) | 0.087 | 1.155 (0.492–2.712) | 0.741 |
| Never vs heavy             | 1.715 (1.025–2.871) | 0.040 | 7.394 (0.965–56.683) | 0.054 | 1.526 (0.645–3.607) | 0.336 |

ACEI, Angiotensin-converting enzyme inhibitor; ARB, Angiotensin receptor blockers; BNP, brain natriuretic peptide; NT-proBNP, N-terminal prohormone of brain natriuretic peptide; EF, ejection fraction; HFrEF, heart failure with reduced ejection fraction; HFmrEF, heart failure with mid-range ejection fraction; HFpEF, heart failure with preserved ejection fraction; HR, hazard ratio; NYHA, New York Heart Association.
