# Supplementary material for: Impact of atrial fibrillation in patients with heart failure and reduced, mid-range or preserved ejection fraction
Source: PubMed Central journal article supplement — Heart. 2020 Apr 27;106(15):1160–8. doi: 10.1136/heartjnl-2019-316219 (PMC7398483; doi:10.1136/heartjnl-2019-316219), 2020-04-27
Supplement: heartjnl-2019-316219supp004.pdf [file heartjnl-2019-316219supp004.pdf]

**Supplementary file 1-4.** Multivariable hazards ratio for stroke associated with atrial fibrillation, according to ejection fraction groups

| Variable                                            | HF <sub>r</sub> EF  |         | HF <sub>mr</sub> EF |         | HF <sub>p</sub> EF  |         |
|-----------------------------------------------------|---------------------|---------|---------------------|---------|---------------------|---------|
|                                                     | HR (95% CI)         | P-value | HR (95% CI)         | P-value | HR (95% CI)         | P-value |
| <b>Atrial fibrillation</b>                          | 1.534 (1.028–2.290) | 0.036   | 1.039 (0.567–1.906) | 0.901   | 1.898 (1.125–3.203) | 0.016   |
| <b>Sex, male</b>                                    | 0.880 (0.546–1.419) | 0.600   | 0.615 (0.294–1.285) | 0.196   | 0.935 (0.485–1.804) | 0.842   |
| <b>Age, ≥80 yrs</b>                                 | 0.962 (0.591–1.566) | 0.877   | 0.933 (0.503–1.733) | 0.827   | 1.049 (0.630–1.747) | 0.855   |
| <b>NYHA functional class</b>                        |                     |         |                     |         |                     |         |
| III vs II                                           | 1.051 (0.582–1.899) | 0.869   | 1.062 (0.429–2.629) | 0.896   | 0.982 (0.523–1.846) | 0.956   |
| IV vs II                                            | 1.216 (0.682–2.168) | 0.508   | 1.484 (0.616–3.576) | 0.379   | 0.887 (0.471–1.672) | 0.711   |
| <b>Hypertension</b>                                 | 1.138 (0.769–1.684) | 0.517   | 1.150 (0.616–2.147) | 0.661   | 1.366 (0.780–2.394) | 0.275   |
| <b>Diabetes mellitus</b>                            | 1.161 (0.772–1.744) | 0.474   | 1.353 (0.725–2.527) | 0.342   | 0.629 (0.350–1.131) | 0.122   |
| <b>Ischemic heart disease</b>                       | 1.393 (0.905–2.144) | 0.132   | 0.897 (0.448–1.798) | 0.760   | 0.947 (0.536–1.671) | 0.850   |
| <b>Renal failure</b>                                | 1.576 (0.964–2.576) | 0.070   | 0.844 (0.337–2.117) | 0.718   | 0.984 (0.429–2.256) | 0.969   |
| <b>Cancer</b>                                       | 1.668 (0.978–2.846) | 0.060   |                     |         | 1.935 (0.899–4.165) | 0.092   |
| <b>Prior stroke</b>                                 | 1.873 (1.238–2.834) | 0.003   | 1.925 (1.090–3.400) | 0.024   | 1.652 (0.948–2.879) | 0.076   |
| <b>Heart rate</b>                                   | 0.999 (0.992–1.006) | 0.783   | 0.998 (0.987–1.009) | 0.701   | 1.006 (0.996–1.015) | 0.256   |
| <b>Systolic blood pressure</b>                      | 1.008 (0.999–1.017) | 0.069   | 1.004 (0.991–1.016) | 0.571   | 1.007 (0.997–1.018) | 0.174   |
| <b>diastolic blood pressure</b>                     | 0.990 (0.976–1.003) | 0.136   | 1.010 (0.991–1.030) | 0.298   | 0.997 (0.980–1.015) | 0.763   |
| <b>Body mass index</b>                              | 0.981 (0.932–1.031) | 0.445   | 1.010 (0.943–1.082) | 0.772   | 0.956 (0.898–1.018) | 0.158   |
| <b>White blood cells</b>                            | 1.029 (0.986–1.075) | 0.189   | 1.002 (0.938–1.072) | 0.942   | 0.968 (0.895–1.047) | 0.417   |
| <b>HbA1c</b>                                        | 0.992 (0.939–1.048) | 0.773   | 0.957 (0.882–1.038) | 0.287   | 1.075 (0.993–1.165) | 0.073   |
| <b>Potassium</b>                                    | 1.193 (0.913–1.560) | 0.196   | 0.948 (0.632–1.421) | 0.796   | 0.981 (0.668–1.442) | 0.923   |
| <b>Sodium ≥135 mmol/L</b>                           | 0.891 (0.578–1.371) | 0.599   | 1.045 (0.525–2.084) | 0.900   | 0.980 (0.518–1.853) | 0.951   |
| <b>Hemoglobin ≥12 g/dL</b>                          | 1.262 (0.826–1.927) | 0.282   | 0.848 (0.468–1.538) | 0.588   | 0.833 (0.516–1.345) | 0.455   |
| <b>Blood urea nitrogen ≥26 mg/dL</b>                | 0.994 (0.651–1.517) | 0.978   | 1.438 (0.747–2.768) | 0.277   | 0.923 (0.494–1.726) | 0.802   |
| <b>Creatinine ≥2 mg/dL</b>                          | 0.610 (0.315–1.182) | 0.143   | 1.556 (0.558–4.342) | 0.398   | 0.816 (0.251–2.656) | 0.735   |
| <b>BNP &gt;900 pg/mL or NTproBNP &gt;5000 pg/mL</b> | 0.957 (0.651–1.406) | 0.823   | 0.756 (0.430–1.328) | 0.330   | 0.732 (0.419–1.276) | 0.271   |
| <b>ACEI or ARB</b>                                  | 1.013 (0.623–1.648) | 0.959   | 0.807 (0.455–1.429) | 0.462   | 0.760 (0.471–1.225) | 0.260   |
| <b>Beta-blockers</b>                                | 1.057 (0.716–1.559) | 0.781   | 1.009 (0.567–1.796) | 0.974   | 1.167 (0.728–1.871) | 0.521   |
| <b>Aldosterone antagonist</b>                       | 1.133 (0.775–1.656) | 0.520   | 1.452 (0.843–2.500) | 0.179   | 0.915 (0.573–1.460) | 0.710   |
| <b>Nitrate</b>                                      | 1.019 (0.702–1.478) | 0.922   | 1.023 (0.592–1.767) | 0.936   | 1.350 (0.829–2.199) | 0.227   |
| <b>Diuretic</b>                                     | 1.652 (0.508–5.369) | 0.404   | 0.814 (0.297–2.229) | 0.689   | 0.806 (0.340–1.909) | 0.624   |

|                            |                     |       |                     |       |                      |       |
|----------------------------|---------------------|-------|---------------------|-------|----------------------|-------|
| <b>Anticoagulant</b>       | 1.363 (0.910–2.041) | 0.133 | 1.977 (1.048–3.731) | 0.035 | 1.024 (0.633–1.657)  | 0.921 |
| <b>Antiplatelet</b>        | 0.821 (0.528–1.275) | 0.380 | 0.843 (0.432–1.645) | 0.617 | 1.298 (0.778–2.167)  | 0.318 |
| <b>Statin</b>              | 1.089 (0.731–1.622) | 0.676 | 1.242 (0.673–2.290) | 0.488 | 1.288 (0.766–2.164)  | 0.340 |
| <b>Smoking status</b>      |                     |       |                     |       |                      |       |
| Ex vs current              | 1.225 (0.740–2.027) | 0.429 | 1.165 (0.498–2.725) | 0.725 | 1.203 (0.499–2.902)  | 0.680 |
| Never vs current           | 0.868 (0.498–1.512) | 0.617 | 0.663 (0.279–1.578) | 0.353 | 0.695 (0.284–1.700)  | 0.425 |
| <b>Alcohol consumption</b> |                     |       |                     |       |                      |       |
| Social vs heavy            | 1.159 (0.561–2.393) | 0.691 | 0.409 (0.173–0.965) | 0.041 | 2.369 (0.543–10.336) | 0.251 |
| Never vs heavy             | 1.229 (0.569–2.652) | 0.599 | 0.371 (0.153–0.897) | 0.028 | 3.339 (0.751–14.853) | 0.113 |

ACEI, Angiotensin-converting enzyme inhibitor; ARB, Angiotensin receptor blockers; BNP, brain natriuretic peptide; NT-proBNP, N-terminal prohormone of brain natriuretic peptide; EF, ejection fraction; HFrEF, heart failure with reduced ejection fraction; HFmrEF, heart failure with mid-range ejection fraction; HFpEF, heart failure with preserved ejection fraction; HR, hazard ratio; NYHA, New York Heart Association.
