# Supplementary material for: Impact of atrial fibrillation in patients with heart failure and reduced, mid-range or preserved ejection fraction
Source: PubMed Central journal article supplement — Heart. 2020 Apr 27;106(15):1160–8. doi: 10.1136/heartjnl-2019-316219 (PMC7398483; doi:10.1136/heartjnl-2019-316219), 2020-04-27
Supplement: heartjnl-2019-316219supp005.pdf [file heartjnl-2019-316219supp005.pdf]

**Supplementary file 2.** Clinical outcomes according to the HF types in patients with and without AF

|                                                 | Without AF          |         |                     |         | With AF             |         |                      |         |
|-------------------------------------------------|---------------------|---------|---------------------|---------|---------------------|---------|----------------------|---------|
|                                                 | Unadjusted          |         | Adjusted            |         | Unadjusted          |         | Adjusted             |         |
|                                                 | HR (95% CI)         | P-value | HR (95% CI)         | P-value | HR (95% CI)         | P-value | HR (95% CI)          | P-value |
| <b>All-cause mortality</b>                      |                     |         |                     |         |                     |         |                      |         |
| HFpEF                                           | reference           |         | reference           |         | reference           |         | reference            |         |
| HFrEF                                           | 1.034 (0.921-1.159) | 0.573   | 0.988 (0.859-1.137) | 0.868   | 0.871 (0.756-1.004) | 0.056   | 0.915 (0.765-1.095)  | 0.333   |
| HFmrEF                                          | 1.053 (0.904-1.228) | 0.507   | 0.914 (0.771-1.083) | 0.299   | 0.978 (0.819-1.169) | 0.809   | 0.906 (0.742-1.108)  | 0.337   |
| <b>All-cause mortality or rehospitalization</b> |                     |         |                     |         |                     |         |                      |         |
| HFpEF                                           | reference           |         | reference           |         | reference           |         | reference            |         |
| HFrEF                                           | 1.017 (0.927-1.116) | 0.720   | 1.071 (0.955-1.202) | 0.240   | 1.189 (0.904-1.564) | 0.216   | 1.028 (0.888-1.190)  | 0.710   |
| HFmrEF                                          | 0.930 (0.820-1.054) | 0.257   | 0.957 (0.832-1.101) | 0.536   | 0.985 (0.684-1.419) | 0.936   | 1.010 (0.860-1.188)  | 0.900   |
| <b>CVD mortality</b>                            |                     |         |                     |         |                     |         |                      |         |
| HFpEF                                           | reference           |         | reference           |         | reference           |         | reference            |         |
| HFrEF                                           | 1.638 (1.289-2.080) | <0.001  | 1.459 (1.097-1.940) | 0.009   | 0.984 (0.877-1.104) | 0.789   | 1.090 (0.769-1.545)  | 0.627   |
| HFmrEF                                          | 1.246 (0.905-1.716) | 0.177   | 1.053 (0.740-1.499) | 0.773   | 1.082 (0.935-1.251) | 0.291   | 0.850 (0.562-1.287)  | 0.443   |
| <b>Stroke</b>                                   |                     |         |                     |         |                     |         |                      |         |
| HFpEF                                           | reference           |         | reference           |         | reference           |         | reference            |         |
| HFrEF                                           | 1.017 (0.927-1.116) | 0.720   | 0.784 (0.493-1.247) | 0.305   | 0.665 (0.456-0.970) | 0.034   | 0.863 (0.5469-1.365) | 0.529   |
| HFmrEF                                          | 0.930 (0.820-1.054) | 0.257   | 1.335 (0.808-2.204) | 0.259   | 1.094 (0.712-1.680) | 0.682   | 1.083 (0.676-1.736)  | 0.741   |

Adjusted for sex, age, smoking status, alcohol consumption, medical history (NYHA functional class, hypertension, diabetes mellitus, ischemic heart disease, renal failure, cancer, prior stroke), heart rate, systolic blood pressure, diastolic blood pressure, body mass index, laboratory examination (white blood cells, glycated hemoglobin [HbA1c], potassium, sodium, hemoglobin, blood urea nitrogen [BUN], creatinine, BNP or NT-proBNP), and medications before or at admission or at discharge (use of angiotensin-converting enzyme inhibitor or angiotensin receptor blockers, beta-blockers, aldosterone antagonist, nitrate, diuretic, anticoagulant, antiplatelet, and statin)
