# Supplementary material for: Impact of atrial fibrillation in patients with heart failure and reduced, mid-range or preserved ejection fraction
Source: PubMed Central journal article supplement — Heart. 2020 Apr 27;106(15):1160–8. doi: 10.1136/heartjnl-2019-316219 (PMC7398483; doi:10.1136/heartjnl-2019-316219), 2020-04-27
Supplement: heartjnl-2019-316219supp006.pdf [file heartjnl-2019-316219supp006.pdf]

**Supplementary file 3-1.** The all-cause mortality rates according to AF status in patients with HF<sub>r</sub>EF, HF<sub>mr</sub>EF, and HF<sub>p</sub>EF (Continued)

| Subgroup                 | HF <sub>r</sub> EF (EF<40%) |            |                                      |                          | HF <sub>mr</sub> EF (EF 40-49%) |            |                                      |                          | HF <sub>p</sub> EF (EF≥50%) |            |                                      |                          |
|--------------------------|-----------------------------|------------|--------------------------------------|--------------------------|---------------------------------|------------|--------------------------------------|--------------------------|-----------------------------|------------|--------------------------------------|--------------------------|
|                          | Cases (%)                   |            | Hazard Ratios<br>(AF vs. without AF) | P <sub>interaction</sub> | Cases (%)                       |            | Hazard Ratios<br>(AF vs. without AF) | P <sub>interaction</sub> | Cases (%)                   |            | Hazard Ratios<br>(AF vs. without AF) | P <sub>interaction</sub> |
|                          | Without AF                  | With AF    |                                      |                          | Without AF                      | With AF    |                                      |                          | Without AF                  | With AF    |                                      |                          |
| <b>Age</b>               |                             |            |                                      |                          |                                 |            |                                      |                          |                             |            |                                      |                          |
| <65 years                | 247 (27.5)                  | 80 (24.8)  |                                      | 0.671                    | 51 (32.9)                       | 20 (32.8)  |                                      | 0.780                    | 53 (27.5)                   | 29 (24.4)  |                                      | 0.497                    |
| ≥65 years                | 920 (67.4)                  | 362 (60.4) |                                      |                          | 231 (62.1)                      | 169 (58.9) |                                      |                          | 335 (60.9)                  | 309 (62.4) |                                      |                          |
| <b>Sex</b>               |                             |            |                                      |                          |                                 |            |                                      |                          |                             |            |                                      |                          |
| Male                     | 698 (51.3)                  | 267 (45.3) |                                      | 0.112                    | 136 (51.3)                      | 87 (58.4)  |                                      | 0.131                    | 146 (49.7)                  | 132 (57.9) |                                      | 0.053                    |
| Female                   | 469 (52.1)                  | 175 (52.7) |                                      |                          | 146 (55.7)                      | 102 (51.3) |                                      |                          | 242 (53.9)                  | 206 (53.4) |                                      |                          |
| <b>Location</b>          |                             |            |                                      |                          |                                 |            |                                      |                          |                             |            |                                      |                          |
| De novo HF               | 500 (40.9)                  | 141 (34.5) |                                      | 0.420                    | 154 (47.0)                      | 76 (46.3)  |                                      | 0.956                    | 224 (47.3)                  | 122 (45.2) |                                      | 0.570                    |
| ADHF                     | 667 (64.2)                  | 301 (58.8) |                                      |                          | 128 (64.3)                      | 113 (61.4) |                                      |                          | 164 (61.0)                  | 216 (62.8) |                                      |                          |
| <b>Hypertension</b>      |                             |            |                                      |                          |                                 |            |                                      |                          |                             |            |                                      |                          |
| No                       | 392 (42.6)                  | 151 (38.7) |                                      | 0.542                    | 74 (44.8)                       | 67 (54.9)  |                                      | 0.152                    | 101 (41.7)                  | 107 (51.7) |                                      | 0.093                    |
| Yes                      | 775 (57.8)                  | 291 (54.8) |                                      |                          | 208 (57.5)                      | 122 (54.0) |                                      |                          | 287 (57.3)                  | 231 (56.8) |                                      |                          |
| <b>Diabetes Mellitus</b> |                             |            |                                      |                          |                                 |            |                                      |                          |                             |            |                                      |                          |
| No                       | 566 (45.6)                  | 249 (41.9) |                                      | 0.171                    | 148 (51.2)                      | 124 (50.6) |                                      | 0.262                    | 223 (47.0)                  | 226 (53.3) |                                      | 0.174                    |
| Yes                      | 601 (58.9)                  | 193 (59.0) |                                      |                          | 134 (56.3)                      | 65 (63.1)  |                                      |                          | 165 (61.3)                  | 112 (58.9) |                                      |                          |
| <b>Renal failure</b>     |                             |            |                                      |                          |                                 |            |                                      |                          |                             |            |                                      |                          |
| No                       | 707 (44.0)                  | 270 (39.9) |                                      | 0.057                    | 152 (44.1)                      | 135 (48.4) |                                      | 0.651                    | 246 (45.4)                  | 254 (50.4) |                                      | 0.849                    |
| Yes                      | 460 (70.3)                  | 172 (70.5) |                                      |                          | 130 (71.4)                      | 54 (78.3)  |                                      |                          | 142 (70.6)                  | 84 (76.4)  |                                      |                          |
| <b>Prior stroke</b>      |                             |            |                                      |                          |                                 |            |                                      |                          |                             |            |                                      |                          |
| No                       | 952 (48.3)                  | 336 (44.4) |                                      | 0.365                    | 242 (53.0)                      | 145 (52.5) |                                      | 0.951                    | 327 (50.8)                  | 258 (51.9) |                                      | 0.583                    |
| Yes                      | 215 (74.1)                  | 106 (64.2) |                                      |                          | 40 (57.1)                       | 44 (62.0)  |                                      |                          | 61 (61.6)                   | 80 (68.4)  |                                      |                          |

AF, atrial fibrillation; EF, ejection fraction; HF<sub>r</sub>EF, heart failure with reduced ejection fraction; HF<sub>mr</sub>EF, heart failure with mid-range ejection fraction; HF<sub>p</sub>EF, heart failure with preserved ejection fraction; ADHF, acute decompensated heart failure; NYHA, New York Heart Association; DM, diabetes mellitus; IHD, ischemic heart disease.

**Supplementary file 3-1.** The all-cause mortality rates according to AF status in patients with HFrEF, HFmrEF, and HFpEF

| Subgroup             | HFrEF (EF<40%) |            |                                                                                   |                          | HFmrEF (EF 40-49%) |            |                                                                                     |                          | HFpEF (EF≥50%) |            |                                                                                     |                          |
|----------------------|----------------|------------|-----------------------------------------------------------------------------------|--------------------------|--------------------|------------|-------------------------------------------------------------------------------------|--------------------------|----------------|------------|-------------------------------------------------------------------------------------|--------------------------|
|                      | Cases (%)      |            | Hazard Ratios<br>(AF vs. without AF)                                              | P <sub>interaction</sub> | Cases (%)          |            | Hazard Ratios<br>(AF vs. without AF)                                                | P <sub>interaction</sub> | Cases (%)      |            | Hazard Ratios<br>(AF vs. without AF)                                                | P <sub>interaction</sub> |
|                      | Without AF     | With AF    |                                                                                   |                          | Without AF         | With AF    |                                                                                     |                          | Without AF     | With AF    |                                                                                     |                          |
| <b>Beta-blockers</b> |                |            |                                                                                   |                          |                    |            |                                                                                     |                          |                |            |                                                                                     |                          |
| No                   | 474 (62.3)     | 165 (57.5) | 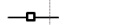 | 0.633                    | 80 (52.6)          | 80 (62.0)  |  | 0.130                    | 185 (52.6)     | 154 (57.0) |  | 0.715                    |
| Yes                  | 693 (46.2)     | 277 (43.7) |  |                          | 202 (53.9)         | 109 (49.8) |  |                          | 203 (51.9)     | 184 (53.5) |  |                          |
| <b>ACEI or ARB</b>   |                |            |                                                                                   |                          |                    |            |                                                                                     |                          |                |            |                                                                                     |                          |
| No                   | 264 (66.3)     | 129 (65.5) |  | 0.331                    | 81 (55.9)          | 55 (59.1)  |  | 0.977                    | 142 (52.4)     | 134 (54.0) |  | 0.662                    |
| Yes                  | 903 (48.5)     | 313 (43.2) |  |                          | 201 (52.6)         | 134 (52.5) |  |                          | 246 (52.1)     | 204 (55.7) |  |                          |
| <b>AA</b>            |                |            |                                                                                   |                          |                    |            |                                                                                     |                          |                |            |                                                                                     |                          |
| No                   | 465 (57.0)     | 183 (54.0) |  | 0.666                    | 152 (53.3)         | 70 (47.9)  |  | 0.108                    | 213 (51.8)     | 138 (56.1) |  | 0.763                    |
| Yes                  | 702 (48.6)     | 259 (44.5) |  |                          | 130 (53.7)         | 119 (58.9) |  |                          | 175 (52.7)     | 200 (54.3) |  |                          |

AF, atrial fibrillation; EF, ejection fraction; HFrEF, heart failure with reduced ejection fraction; HFmrEF, heart failure with mid-range ejection fraction; HFpEF, heart failure with preserved ejection fraction; ADHF, acute decompensated heart failure; NYHA, New York Heart Association; DM, diabetes mellitus; IHD, ischemic heart disease.
