# Supplementary material for: Impact of atrial fibrillation in patients with heart failure and reduced, mid-range or preserved ejection fraction
Source: PubMed Central journal article supplement — Heart. 2020 Apr 27;106(15):1160–8. doi: 10.1136/heartjnl-2019-316219 (PMC7398483; doi:10.1136/heartjnl-2019-316219), 2020-04-27
Supplement: heartjnl-2019-316219supp007.pdf [file heartjnl-2019-316219supp007.pdf]

**Supplementary file 3-2.** Event rates of all-cause mortality or readmission according to AF status in patients with HFrEF, HFmrEF, and HFpEF (Continued)

| Subgroup                 | HFrEF (EF<40%) |            |                                      |                          | HFmrEF (EF 40-49%) |            |                                      |                          | HFpEF (EF≥50%) |            |                                      |                          |
|--------------------------|----------------|------------|--------------------------------------|--------------------------|--------------------|------------|--------------------------------------|--------------------------|----------------|------------|--------------------------------------|--------------------------|
|                          | Cases (%)      |            | Hazard Ratios<br>(AF vs. without AF) | P <sub>interaction</sub> | Cases (%)          |            | Hazard Ratios<br>(AF vs. without AF) | P <sub>interaction</sub> | Cases (%)      |            | Hazard Ratios<br>(AF vs. without AF) | P <sub>interaction</sub> |
|                          | Without AF     | With AF    |                                      |                          | Without AF         | With AF    |                                      |                          | Without AF     | With AF    |                                      |                          |
| <b>Age</b>               |                |            |                                      |                          |                    |            |                                      |                          |                |            |                                      |                          |
| <65 years                | 617 (68.8)     | 215 (66.8) |                                      | 0.325                    | 99 (63.9)          | 46 (75.4)  |                                      | 0.223                    | 132 (68.4)     | 74 (62.2)  |                                      | 0.182                    |
| ≥65 years                | 1202 (88.1)    | 498 (83.1) |                                      |                          | 315 (84.7)         | 243 (84.7) |                                      |                          | 464 (84.4)     | 418 (84.4) |                                      |                          |
| <b>Sex</b>               |                |            |                                      |                          |                    |            |                                      |                          |                |            |                                      |                          |
| Male                     | 1099 (80.7)    | 446 (75.7) |                                      | 0.324                    | 201 (75.8)         | 122 (81.9) |                                      | 0.589                    | 233 (79.3)     | 185 (81.1) |                                      | 0.406                    |
| Female                   | 720 (80.0)     | 267 (80.4) |                                      |                          | 213 (81.3)         | 167 (83.9) |                                      |                          | 363 (80.8)     | 307 (79.5) |                                      |                          |
| <b>Location</b>          |                |            |                                      |                          |                    |            |                                      |                          |                |            |                                      |                          |
| De novo HF               | 878 (71.8)     | 273 (66.7) |                                      | 0.645                    | 238 (72.6)         | 131 (79.9) |                                      | 0.971                    | 357 (75.3)     | 201 (74.4) |                                      | 0.841                    |
| ADHF                     | 941 (90.6)     | 440 (85.9) |                                      |                          | 176 (88.4)         | 158 (85.9) |                                      |                          | 239 (88.8)     | 291 (84.6) |                                      |                          |
| <b>Hypertension</b>      |                |            |                                      |                          |                    |            |                                      |                          |                |            |                                      |                          |
| No                       | 703 (76.3)     | 280 (71.8) |                                      | 0.150                    | 120 (72.7)         | 98 (80.3)  |                                      | 0.551                    | 186 (76.9)     | 158 (76.3) |                                      | 0.850                    |
| Yes                      | 1116 (83.3)    | 433 (81.5) |                                      |                          | 294 (81.2)         | 191 (84.5) |                                      |                          | 410 (81.8)     | 334 (82.1) |                                      |                          |
| <b>Diabetes Mellitus</b> |                |            |                                      |                          |                    |            |                                      |                          |                |            |                                      |                          |
| No                       | 933 (75.2)     | 441 (74.2) |                                      | 0.830                    | 222 (76.8)         | 200 (81.6) |                                      | 0.519                    | 363 (76.6)     | 335 (79.0) |                                      | 0.895                    |
| Yes                      | 886 (86.8)     | 272 (83.2) |                                      |                          | 192 (80.7)         | 89 (86.4)  |                                      |                          | 233 (86.6)     | 157 (82.6) |                                      |                          |
| <b>Renal failure</b>     |                |            |                                      |                          |                    |            |                                      |                          |                |            |                                      |                          |
| No                       | 1214 (75.5)    | 492 (72.7) |                                      | 0.555                    | 248 (71.9)         | 227 (81.4) |                                      | 0.079                    | 414 (76.4)     | 393 (78.0) |                                      | 0.315                    |
| Yes                      | 605 (92.5)     | 221 (90.6) |                                      |                          | 166 (91.2)         | 62 (89.9)  |                                      |                          | 182 (90.5)     | 99 (90.0)  |                                      |                          |
| <b>Prior stroke</b>      |                |            |                                      |                          |                    |            |                                      |                          |                |            |                                      |                          |
| No                       | 1551 (78.7)    | 573 (75.8) |                                      | 0.616                    | 353 (77.2)         | 227 (82.2) |                                      | 0.092                    | 511 (79.3)     | 390 (78.5) |                                      | 0.818                    |
| Yes                      | 268 (92.4)     | 140 (84.8) |                                      |                          | 61 (87.1)          | 61 (85.9)  |                                      |                          | 85 (85.9)      | 102 (87.2) |                                      |                          |

AF, atrial fibrillation; EF, ejection fraction; HFrEF, heart failure with reduced ejection fraction; HFmrEF, heart failure with mid-range ejection fraction; HFpEF, heart failure with preserved ejection fraction; ADHF, acute decompensated heart failure; NYHA, New York Heart Association; DM, diabetes mellitus; IHD, ischemic heart disease.

**Supplementary file 3-2.** Event rates of all-cause mortality or readmission according to AF status in patients with HFrEF, HFmrEF, and HFpEF

| Subgroup             | HFrEF (EF<40%) |            |                                      |                          | HFmrEF (EF 40-49%) |            |                                      |                          | HFpEF (EF≥50%) |            |                                      |                          |
|----------------------|----------------|------------|--------------------------------------|--------------------------|--------------------|------------|--------------------------------------|--------------------------|----------------|------------|--------------------------------------|--------------------------|
|                      | Cases (%)      |            | Hazard Ratios<br>(AF vs. without AF) | P <sub>interaction</sub> | Cases (%)          |            | Hazard Ratios<br>(AF vs. without AF) | P <sub>interaction</sub> | Cases (%)      |            | Hazard Ratios<br>(AF vs. without AF) | P <sub>interaction</sub> |
|                      | Without AF     | With AF    |                                      |                          | Without AF         | With AF    |                                      |                          | Without AF     | With AF    |                                      |                          |
| <b>Beta-blockers</b> |                |            |                                      |                          |                    |            |                                      |                          |                |            |                                      |                          |
| No                   | 649 (85.3)     | 239 (83.3) |                                      | 0.883                    | 118 (77.6)         | 112 (86.8) |                                      | 0.300                    | 282 (80.1)     | 223 (82.6) |                                      | 0.529                    |
| Yes                  | 1170 (78.0)    | 474 (74.8) |                                      | 0.875                    | 296 (78.9)         | 177 (80.8) |                                      | 0.687                    | 314 (80.3)     | 269 (78.2) |                                      | 0.322                    |
| <b>ACEI or ARB</b>   |                |            |                                      |                          |                    |            |                                      |                          |                |            |                                      |                          |
| No                   | 363 (91.2)     | 172 (87.3) |                                      | 0.167                    | 115 (79.3)         | 81 (87.1)  |                                      | 0.452                    | 222 (81.9)     | 196 (79.0) |                                      | 0.149                    |
| Yes                  | 1456 (78.2)    | 541 (74.7) |                                      | 0.167                    | 299 (78.3)         | 208 (81.6) |                                      | 0.452                    | 374 (79.2)     | 296 (80.9) |                                      | 0.149                    |
| <b>AA</b>            |                |            |                                      |                          |                    |            |                                      |                          |                |            |                                      |                          |
| No                   | 676 (82.8)     | 261 (77.0) |                                      | 0.167                    | 223 (78.2)         | 120 (82.2) |                                      | 0.452                    | 329 (80.0)     | 202 (82.1) |                                      | 0.149                    |
| Yes                  | 1143 (79.1)    | 452 (77.7) |                                      | 0.167                    | 191 (78.9)         | 169 (83.7) |                                      | 0.452                    | 267 (80.4)     | 290 (78.8) |                                      | 0.149                    |

AF, atrial fibrillation; EF, ejection fraction; HFrEF, heart failure with reduced ejection fraction; HFmrEF, heart failure with mid-range ejection fraction; HFpEF, heart failure with preserved ejection fraction; ADHF, acute decompensated heart failure; NYHA, New York Heart Association; DM, diabetes mellitus; IHD, ischemic heart disease.
