# Supplementary material for: Impact of atrial fibrillation in patients with heart failure and reduced, mid-range or preserved ejection fraction
Source: PubMed Central journal article supplement — Heart. 2020 Apr 27;106(15):1160–8. doi: 10.1136/heartjnl-2019-316219 (PMC7398483; doi:10.1136/heartjnl-2019-316219), 2020-04-27
Supplement: heartjnl-2019-316219supp008.pdf [file heartjnl-2019-316219supp008.pdf]

Supplementary file 3-3. Event rates of CV mortality according to AF status in patients with HFrEF, HFmrEF, and HFpEF (Continued)

| Subgroup                 | HFrEF (EF<40%) |            |                                      |                          | HFmrEF (EF 40-49%) |           |                                      |                          | HFpEF (EF≥50%) |           |                                      |                          |
|--------------------------|----------------|------------|--------------------------------------|--------------------------|--------------------|-----------|--------------------------------------|--------------------------|----------------|-----------|--------------------------------------|--------------------------|
|                          | Cases (%)      |            | Hazard Ratios<br>(AF vs. without AF) | P <sub>interaction</sub> | Cases (%)          |           | Hazard Ratios<br>(AF vs. without AF) | P <sub>interaction</sub> | Cases (%)      |           | Hazard Ratios<br>(AF vs. without AF) | P <sub>interaction</sub> |
|                          | Without AF     | With AF    |                                      |                          | Without AF         | With AF   |                                      |                          | Without AF     | With AF   |                                      |                          |
| <b>Age</b>               |                |            |                                      |                          |                    |           |                                      |                          |                |           |                                      |                          |
| <65 years                | 98 (10.9)      | 29 (9.0)   |                                      | 0.930                    | 11 (7.1)           | 5 (8.2)   |                                      | 0.619                    | 14 (7.3)       | 4 (3.4)   |                                      | 0.085                    |
| ≥65 years                | 291 (21.3)     | 112 (18.7) |                                      |                          | 59 (15.9)          | 40 (13.9) |                                      |                          | 67 (12.2)      | 76 (15.4) |                                      |                          |
| <b>Sex</b>               |                |            |                                      |                          |                    |           |                                      |                          |                |           |                                      |                          |
| Male                     | 238 (17.5)     | 87 (14.8)  |                                      | 0.413                    | 33 (12.5)          | 16 (10.7) |                                      | 0.736                    | 31 (10.5)      | 31 (13.6) |                                      | 0.496                    |
| Female                   | 151 (16.8)     | 54 (16.3)  |                                      |                          | 37 (14.1)          | 29 (14.6) |                                      |                          | 50 (11.1)      | 49 (12.7) |                                      |                          |
| <b>Location</b>          |                |            |                                      |                          |                    |           |                                      |                          |                |           |                                      |                          |
| De novo HF               | 149 (12.2)     | 31 (7.6)   |                                      | 0.076                    | 36 (11.0)          | 16 (9.8)  |                                      | 0.875                    | 44 (9.3)       | 21 (7.8)  |                                      | 0.225                    |
| ADHF                     | 240 (23.1)     | 110 (21.5) |                                      |                          | 34 (17.1)          | 29 (15.8) |                                      |                          | 37 (13.8)      | 59 (17.2) |                                      |                          |
| <b>Hypertension</b>      |                |            |                                      |                          |                    |           |                                      |                          |                |           |                                      |                          |
| No                       | 130 (14.1)     | 51 (13.1)  |                                      | 0.881                    | 16 (9.7)           | 15 (12.3) |                                      | 0.386                    | 17 (7.0)       | 26 (12.6) |                                      | 0.107                    |
| Yes                      | 259 (19.3)     | 90 (16.9)  |                                      |                          | 54 (14.9)          | 30 (13.3) |                                      |                          | 64 (12.8)      | 54 (13.3) |                                      |                          |
| <b>Diabetes Mellitus</b> |                |            |                                      |                          |                    |           |                                      |                          |                |           |                                      |                          |
| No                       | 193 (15.6)     | 81 (13.6)  |                                      | 0.502                    | 39 (13.5)          | 26 (10.6) |                                      | 0.087                    | 45 (9.5)       | 61 (14.4) |                                      | 0.033                    |
| Yes                      | 196 (19.2)     | 60 (18.3)  |                                      |                          | 31 (13.0)          | 19 (18.4) |                                      |                          | 36 (13.4)      | 19 (10.0) |                                      |                          |
| <b>Renal failure</b>     |                |            |                                      |                          |                    |           |                                      |                          |                |           |                                      |                          |
| No                       | 204 (12.7)     | 68 (10.0)  |                                      | 0.057                    | 30 (8.7)           | 31 (11.1) |                                      | 0.521                    | 48 (8.9)       | 49 (9.7)  |                                      | 0.115                    |
| Yes                      | 185 (28.3)     | 73 (29.9)  |                                      |                          | 40 (22.0)          | 14 (20.3) |                                      |                          | 33 (16.4)      | 31 (28.2) |                                      |                          |
| <b>Prior stroke</b>      |                |            |                                      |                          |                    |           |                                      |                          |                |           |                                      |                          |
| No                       | 322 (16.3)     | 115 (15.2) |                                      | 0.158                    | 60 (13.1)          | 38 (13.8) |                                      | 0.378                    | 63 (9.8)       | 60 (12.1) |                                      | 0.536                    |
| Yes                      | 67 (23.1)      | 26 (15.8)  |                                      |                          | 10 (14.3)          | 7 (9.9)   |                                      |                          | 18 (18.2)      | 20 (17.1) |                                      |                          |

AF, atrial fibrillation; EF, ejection fraction; HFrEF, heart failure with reduced ejection fraction; HFmrEF, heart failure with mid-range ejection fraction; HFpEF, heart failure with preserved ejection fraction; ADHF, acute decompensated heart failure; NYHA, New York Heart Association; DM, diabetes mellitus; IHD, ischemic heart disease.

## Supplementary file 3-3. Event rates of CV mortality according to AF status in patients with HFrEF, HFmrEF, and HFpEF

| Subgroup             | HFrEF (EF<40%) |           |                                      |                          | HFmrEF (EF 40-49%) |           |                                      |                          | HFpEF (EF≥50%) |           |                                      |                          |
|----------------------|----------------|-----------|--------------------------------------|--------------------------|--------------------|-----------|--------------------------------------|--------------------------|----------------|-----------|--------------------------------------|--------------------------|
|                      | Cases (%)      |           | Hazard Ratios<br>(AF vs. without AF) | P <sub>interaction</sub> | Cases (%)          |           | Hazard Ratios<br>(AF vs. without AF) | P <sub>interaction</sub> | Cases (%)      |           | Hazard Ratios<br>(AF vs. without AF) | P <sub>interaction</sub> |
|                      | Without AF     | With AF   |                                      |                          | Without AF         | With AF   |                                      |                          | Without AF     | With AF   |                                      |                          |
| <b>Beta-blockers</b> |                |           |                                      |                          |                    |           |                                      |                          |                |           |                                      |                          |
| No                   | 174 (22.9)     | 66 (23.0) |                                      | 0.380                    | 27 (17.8)          | 19 (14.7) |                                      | 0.649                    | 41 (11.6)      | 42 (15.6) |                                      | 0.531                    |
| Yes                  | 215 (14.3)     | 75 (11.8) |                                      |                          | 43 (11.5)          | 26 (11.9) |                                      |                          | 40 (10.2)      | 38 (11.0) |                                      |                          |
| <b>ACEI or ARB</b>   |                |           |                                      |                          |                    |           |                                      |                          |                |           |                                      |                          |
| No                   | 122 (30.7)     | 53 (26.9) |                                      | 0.883                    | 23 (15.9)          | 9 (9.7)   |                                      | 0.135                    | 26 (9.6)       | 37 (14.9) |                                      | 0.206                    |
| Yes                  | 267 (14.3)     | 88 (12.2) |                                      |                          | 47 (12.3)          | 36 (14.1) |                                      |                          | 55 (11.7)      | 43 (11.7) |                                      |                          |
| <b>AA</b>            |                |           |                                      |                          |                    |           |                                      |                          |                |           |                                      |                          |
| No                   | 171 (21.0)     | 63 (18.6) |                                      | 0.962                    | 32 (11.2)          | 15 (10.3) |                                      | 0.770                    | 52 (12.7)      | 32 (13.0) |                                      | 0.261                    |
| Yes                  | 218 (15.1)     | 78 (13.4) |                                      |                          | 38 (15.7)          | 30 (14.9) |                                      |                          | 29 (8.7)       | 48 (13.0) |                                      |                          |

AF, atrial fibrillation; EF, ejection fraction; HFrEF, heart failure with reduced ejection fraction; HFmrEF, heart failure with mid-range ejection fraction; HFpEF, heart failure with preserved ejection fraction; ADHF, acute decompensated heart failure; NYHA, New York Heart Association; DM, diabetes mellitus; IHD, ischemic heart disease.
