# Supplementary material for: Impact of atrial fibrillation in patients with heart failure and reduced, mid-range or preserved ejection fraction
Source: PubMed Central journal article supplement — Heart. 2020 Apr 27;106(15):1160–8. doi: 10.1136/heartjnl-2019-316219 (PMC7398483; doi:10.1136/heartjnl-2019-316219), 2020-04-27
Supplement: heartjnl-2019-316219supp009.pdf [file heartjnl-2019-316219supp009.pdf]

Supplementary file 3-4. Event rates of stroke according to AF status in patients with HF<sub>r</sub>EF, HF<sub>m</sub>rEF, and HF<sub>p</sub>EF (Continued)

| Subgroup                 | HF <sub>r</sub> EF (EF<40%) |          |                                      |                          | HF <sub>m</sub> rEF (EF 40-49%) |           |                                      |                          | HF <sub>p</sub> EF (EF≥50%) |           |                                      |                          |
|--------------------------|-----------------------------|----------|--------------------------------------|--------------------------|---------------------------------|-----------|--------------------------------------|--------------------------|-----------------------------|-----------|--------------------------------------|--------------------------|
|                          | Cases (%)                   |          | Hazard Ratios<br>(AF vs. without AF) | P <sub>interaction</sub> | Cases (%)                       |           | Hazard Ratios<br>(AF vs. without AF) | P <sub>interaction</sub> | Cases (%)                   |           | Hazard Ratios<br>(AF vs. without AF) | P <sub>interaction</sub> |
|                          | Without AF                  | With AF  |                                      |                          | Without AF                      | With AF   |                                      |                          | Without AF                  | With AF   |                                      |                          |
| <b>Age</b>               |                             |          |                                      |                          |                                 |           |                                      |                          |                             |           |                                      |                          |
| <65 years                | 35 (3.9)                    | 15 (4.7) |                                      | 0.486                    | 13 (8.4)                        | 5 (8.2)   |                                      | 0.492                    | 7 (3.6)                     | 10 (8.4)  |                                      | 0.603                    |
| ≥65 years                | 56 (4.1)                    | 39 (6.5) |                                      |                          | 27 (7.3)                        | 29 (10.1) |                                      |                          | 28 (5.1)                    | 44 (8.9)  |                                      |                          |
| <b>Sex</b>               |                             |          |                                      |                          |                                 |           |                                      |                          |                             |           |                                      |                          |
| Male                     | 59 (4.3)                    | 32 (5.4) |                                      | 0.223                    | 24 (9.1)                        | 12 (8.1)  |                                      | 0.137                    | 14 (4.8)                    | 17 (7.5)  |                                      | 0.658                    |
| Female                   | 32 (3.6)                    | 22 (6.6) |                                      |                          | 16 (6.1)                        | 22 (11.1) |                                      |                          | 21 (4.7)                    | 37 (9.6)  |                                      |                          |
| <b>Location</b>          |                             |          |                                      |                          |                                 |           |                                      |                          |                             |           |                                      |                          |
| De novo HF               | 50 (4.1)                    | 25 (6.1) |                                      | 0.934                    | 25 (7.6)                        | 16 (9.8)  |                                      | 0.893                    | 20 (4.2)                    | 26 (9.6)  |                                      | 0.319                    |
| ADHF                     | 41 (3.9)                    | 29 (5.7) |                                      |                          | 15 (7.5)                        | 18 (9.8)  |                                      |                          | 15 (5.6)                    | 28 (8.1)  |                                      |                          |
| <b>Hypertension</b>      |                             |          |                                      |                          |                                 |           |                                      |                          |                             |           |                                      |                          |
| No                       | 31 (3.4)                    | 22 (5.6) |                                      | 0.561                    | 8 (4.8)                         | 12 (9.8)  |                                      | 0.246                    | 9 (3.7)                     | 14 (6.8)  |                                      | 0.992                    |
| Yes                      | 60 (4.5)                    | 32 (6.0) |                                      |                          | 32 (8.8)                        | 22 (9.7)  |                                      |                          | 26 (5.2)                    | 40 (9.8)  |                                      |                          |
| <b>Diabetes Mellitus</b> |                             |          |                                      |                          |                                 |           |                                      |                          |                             |           |                                      |                          |
| No                       | 43 (3.5)                    | 35 (5.9) |                                      | 0.426                    | 19 (6.6)                        | 21 (8.6)  |                                      | 0.742                    | 24 (5.1)                    | 40 (9.4)  |                                      | 0.909                    |
| Yes                      | 48 (4.7)                    | 19 (5.8) |                                      |                          | 21 (8.8)                        | 13 (12.6) |                                      |                          | 11 (4.1)                    | 14 (7.4)  |                                      |                          |
| <b>Renal failure</b>     |                             |          |                                      |                          |                                 |           |                                      |                          |                             |           |                                      |                          |
| No                       | 61 (3.8)                    | 39 (5.8) |                                      | 0.922                    | 22 (6.4)                        | 29 (10.4) |                                      | 0.169                    | 23 (4.2)                    | 51 (10.1) |                                      | 0.019                    |
| Yes                      | 30 (4.6)                    | 15 (6.1) |                                      |                          | 18 (9.9)                        | 5 (7.2)   |                                      |                          | 12 (6.0)                    | 3 (2.7)   |                                      |                          |
| <b>Prior stroke</b>      |                             |          |                                      |                          |                                 |           |                                      |                          |                             |           |                                      |                          |
| No                       | 72 (3.7)                    | 38 (5.0) |                                      | 0.901                    | 30 (6.6)                        | 23 (8.3)  |                                      | 0.504                    | 28 (4.3)                    | 42 (8.5)  |                                      | 0.599                    |
| Yes                      | 19 (6.6)                    | 16 (9.7) |                                      |                          | 10 (14.3)                       | 10 (14.1) |                                      |                          | 7 (7.1)                     | 12 (10.3) |                                      |                          |

AF, atrial fibrillation; EF, ejection fraction; HF<sub>r</sub>EF, heart failure with reduced ejection fraction; HF<sub>m</sub>rEF, heart failure with mid-range ejection fraction; HF<sub>p</sub>EF, heart failure with preserved ejection fraction; ADHF, acute decompensated heart failure; NYHA, New York Heart Association; DM, diabetes mellitus; IHD, ischemic heart disease.

## Supplementary file 3-4. Event rates of stroke according to AF status in patients with HFrEF, HFmrEF, and HFpEF

| Subgroup             | HFrEF (EF<40%) |          |                                      |                          | HFmrEF (EF 40-49%) |           |                                      |                          | HFpEF (EF≥50%) |          |                                      |                          |
|----------------------|----------------|----------|--------------------------------------|--------------------------|--------------------|-----------|--------------------------------------|--------------------------|----------------|----------|--------------------------------------|--------------------------|
|                      | Cases (%)      |          | Hazard Ratios<br>(AF vs. without AF) | P <sub>interaction</sub> | Cases (%)          |           | Hazard Ratios<br>(AF vs. without AF) | P <sub>interaction</sub> | Cases (%)      |          | Hazard Ratios<br>(AF vs. without AF) | P <sub>interaction</sub> |
|                      | Without AF     | With AF  |                                      |                          | Without AF         | With AF   |                                      |                          | Without AF     | With AF  |                                      |                          |
| <b>Beta-blockers</b> |                |          |                                      |                          |                    |           |                                      |                          |                |          |                                      |                          |
| No                   | 31 (4.1)       | 14 (4.9) |                                      | 0.446                    | 8 (5.3)            | 13 (10.1) |                                      | 0.298                    | 14 (4.0)       | 21 (7.8) |                                      | 0.855                    |
| Yes                  | 60 (4.0)       | 40 (6.3) |                                      |                          | 32 (8.5)           | 21 (9.6)  |                                      |                          | 21 (5.4)       | 33 (9.6) |                                      |                          |
| <b>ACEI or ARB</b>   |                |          |                                      |                          |                    |           |                                      |                          |                |          |                                      |                          |
| No                   | 16 (4.0)       | 10 (5.1) |                                      | 0.691                    | 10 (6.9)           | 10 (10.8) |                                      | 0.709                    | 13 (4.8)       | 22 (8.9) |                                      | 0.994                    |
| Yes                  | 75 (4.0)       | 44 (6.1) |                                      |                          | 30 (7.9)           | 24 (9.4)  |                                      |                          | 22 (4.7)       | 32 (8.7) |                                      |                          |
| <b>AA</b>            |                |          |                                      |                          |                    |           |                                      |                          |                |          |                                      |                          |
| No                   | 33 (4.0)       | 14 (4.1) |                                      | 0.166                    | 23 (8.1)           | 13 (8.9)  |                                      | 0.441                    | 22 (5.4)       | 23 (9.3) |                                      | 0.631                    |
| Yes                  | 58 (4.0)       | 40 (6.9) |                                      |                          | 17 (7.0)           | 21 (10.4) |                                      |                          | 13 (3.9)       | 31 (8.4) |                                      |                          |

AF, atrial fibrillation; EF, ejection fraction; HFrEF, heart failure with reduced ejection fraction; HFmrEF, heart failure with mid-range ejection fraction; HFpEF, heart failure with preserved ejection fraction; ADHF, acute decompensated heart failure; NYHA, New York Heart Association; DM, diabetes mellitus; IHD, ischemic heart disease.
