# Supplementary material for: Impact of atrial fibrillation in patients with heart failure and reduced, mid-range or preserved ejection fraction
Source: PubMed Central journal article supplement — Heart. 2020 Apr 27;106(15):1160–8. doi: 10.1136/heartjnl-2019-316219 (PMC7398483; doi:10.1136/heartjnl-2019-316219), 2020-04-27
Supplement: heartjnl-2019-316219supp010.pdf [file heartjnl-2019-316219supp010.pdf]

**Supplementary file 4.** Baseline characteristics of study population according to heart rhythm in patients with HF<sub>r</sub>EF, HF<sub>m</sub>rEF, and HF<sub>p</sub>EF for the propensity score matched cohort

|                                        | HF <sub>r</sub> EF (EF <40%)   |                           |         |         | HF <sub>m</sub> rEF (EF 40–49%) |                           |         |         | HF <sub>p</sub> EF (EF ≥50%) |                           |         |      |
|----------------------------------------|--------------------------------|---------------------------|---------|---------|---------------------------------|---------------------------|---------|---------|------------------------------|---------------------------|---------|------|
|                                        | Without AF<br>(n=1,685; 72.4%) | With AF<br>(n=642; 27.6%) | P-value | SMD (%) | Without AF<br>(n=276; 64.3%)    | With AF<br>(n=153; 35.7%) | P-value | SMD (%) | Without AF<br>(n=572; 64.4%) | With AF<br>(n=316; 35.6%) | P-value | SMD  |
| <b>Characteristics</b>                 |                                |                           |         |         |                                 |                           |         |         |                              |                           |         |      |
| Age, yrs                               | 66.0±15.4                      | 67.1±13.4                 | 0.081   | 9.3     | 71.6±13.4                       | 72.5±11.7                 | 0.499   | 20.4    | 72.6±13.6                    | 73.2±12.2                 | 0.517   | 11.9 |
| Sex                                    |                                |                           | 0.150   | 1.0     |                                 |                           | 0.888   | 0.01    |                              |                           | 0.349   | 3.01 |
| Male                                   | 1024 (60.8)                    | 411 (64.0)                |         |         | 121 (43.8)                      | 66 (43.1)                 |         |         | 217 (37.9)                   | 130 (41.1)                |         |      |
| Female                                 | 661 (39.2)                     | 231 (36.0)                |         |         | 155 (56.2)                      | 87 (56.9)                 |         |         | 355 (62.1)                   | 186 (58.9)                |         |      |
| Smoking status                         |                                |                           | 0.344   | 1.7     |                                 |                           | 0.605   | 2.3     |                              |                           | 0.220   | 2.1  |
| Current                                | 363 (21.5)                     | 130 (20.2)                |         |         | 31 (11.2)                       | 13 (8.5)                  |         |         | 77 (13.5)                    | 34 (10.8)                 |         |      |
| Ex                                     | 398 (23.6)                     | 170 (26.5)                |         |         | 61 (22.1)                       | 32 (20.9)                 |         |         | 90 (15.7)                    | 62 (19.6)                 |         |      |
| Never                                  | 924 (54.8)                     | 342 (53.3)                |         |         | 184 (66.7)                      | 108 (70.6)                |         |         | 405 (70.8)                   | 220 (69.6)                |         |      |
| Alcohol consumption                    |                                |                           | 0.096   | 0.5     |                                 |                           | 0.502   | 1.2     |                              |                           | 0.549   | 0.6  |
| Heavy                                  | 124 (7.4)                      | 62 (9.7)                  |         |         | 16 (5.8)                        | 5 (3.3)                   |         |         | 28 (4.9)                     | 21 (6.6)                  |         |      |
| Social                                 | 608 (36.1)                     | 242 (37.7)                |         |         | 74 (26.8)                       | 41 (26.8)                 |         |         | 143 (25.0)                   | 77 (24.4)                 |         |      |
| Never                                  | 953 (56.6)                     | 338 (52.6)                |         |         | 186 (67.4)                      | 107 (69.9)                |         |         | 401 (70.1)                   | 218 (69.0)                |         |      |
| <b>Medical history</b>                 |                                |                           |         |         |                                 |                           |         |         |                              |                           |         |      |
| NYHA functional class                  |                                |                           | 0.546   | 0.8     |                                 |                           | 0.264   | 1.6     |                              |                           | 0.896   | 1.7  |
| II                                     | 225 (13.4)                     | 89 (13.9)                 |         |         | 50 (18.1)                       | 23 (15.0)                 |         |         | 96 (16.8)                    | 56 (17.7)                 |         |      |
| III                                    | 601 (35.7)                     | 242 (37.7)                |         |         | 82 (29.7)                       | 57 (37.3)                 |         |         | 205 (35.8)                   | 115 (36.4)                |         |      |
| IV                                     | 859 (51)                       | 311 (48.4)                |         |         | 144 (52.2)                      | 73 (47.7)                 |         |         | 271 (47.4)                   | 145 (45.9)                |         |      |
| Hypertension                           | 1000 (59.3)                    | 368 (57.3)                | 0.375   | 1.1     | 202 (73.2)                      | 105 (68.6)                | 0.316   | 1.9     | 395 (69.1)                   | 203 (64.2)                | 0.143   | 3.3  |
| Diabetes mellitus                      | 726 (43.1)                     | 242 (37.7)                | 0.018   | 0.1     | 110 (39.9)                      | 52 (34)                   | 0.230   | 0.4     | 208 (36.4)                   | 100 (31.6)                | 0.157   | 1.0  |
| Ischemic heart disease                 | 800 (47.5)                     | 232 (36.1)                | <0.001  | 1.7     | 163 (59.1)                      | 73 (47.7)                 | 0.024   | 2.7     | 207 (36.2)                   | 90 (28.5)                 | 0.020   | 1.4  |
| Renal failure                          | 473 (28.1)                     | 171 (26.6)                | 0.489   | 0.6     | 86 (31.2)                       | 38 (24.8)                 | 0.166   | 0.6     | 146 (25.5)                   | 69 (21.8)                 | 0.219   | 0.5  |
| Cancer                                 | 146 (8.7)                      | 59 (9.2)                  | 0.689   | 0.4     | 22 (8.0)                        | 15 (9.8)                  | 0.517   | 0.4     | 46 (8.0)                     | 28 (8.9)                  | 0.673   | 0.6  |
| Prior stroke                           | 237 (14.1)                     | 104 (16.2)                | 0.193   | 0.6     | 37 (13.4)                       | 24 (15.7)                 | 0.517   | 1.1     | 81 (14.2)                    | 51 (16.1)                 | 0.428   | 0.2  |
| <b>Examinations</b>                    |                                |                           |         |         |                                 |                           |         |         |                              |                           |         |      |
| Heart rate, beats/min                  | 95.4±23.1                      | 97.5±29.3                 | 0.100   | 0.2     | 89.4±22.7                       | 91.6±29.3                 | 0.428   | 18.0    | 83.5±22.1                    | 86.0±26.5                 | 0.150   | 7.7  |
| Systolic blood pressure, mmHg          | 128.8±29.6                     | 125.7±26.4                | 0.015   | 3.1     | 139.9±34.0                      | 139.4±29.0                | 0.868   | 9.0     | 138.7±32.0                   | 137.1±28.7                | 0.464   | 20.3 |
| Diastolic blood pressure, mmHg         | 79.6±19.1                      | 79.5±17.7                 | 0.896   | 18.2    | 80.3±19.5                       | 80.7±18.7                 | 0.843   | 15.1    | 76.1±18.4                    | 77.0±17.7                 | 0.484   | 17.9 |
| Body mass index, kg/m <sup>2</sup>     | 23.1±3.9                       | 23.3±3.8                  | 0.327   | 6.0     | 23.2±3.6                        | 23.3±3.7                  | 0.924   | 7.0     | 23.9±4.0                     | 23.5±4.2                  | 0.254   | 7.4  |
| <b>Laboratory examinations</b>         |                                |                           |         |         |                                 |                           |         |         |                              |                           |         |      |
| White blood cells, 10 <sup>3</sup> /mL | 8.9±3.8                        | 8.4±3.5                   | 0.010   | 1.0     | 9.1±3.8                         | 8.8±3.9                   | 0.442   | 24.3    | 8.5±3.4                      | 7.9±3.1                   | 0.010   | 9.0  |
| HbA1c, %                               | 2.8±3.5                        | 2.5±3.3                   | 0.045   | 4.4     | 2.5±3.3                         | 2.1±3.2                   | 0.277   | 2.3     | 2.3±3.2                      | 1.9±3.0                   | 0.050   | 14.5 |
| Potassium, mmol/L                      | 4.4±0.7                        | 4.4±0.6                   | 0.451   | 1.3     | 4.4±0.8                         | 4.3±0.6                   | 0.444   | 1.8     | 4.3±0.7                      | 4.3±0.7                   | 0.303   | 1.6  |
| Sodium ≥135 mmol/L                     | 1325 (78.6)                    | 487 (75.9)                | 0.149   | 0.7     | 227 (82.2)                      | 128 (83.7)                | 0.710   | 1.1     | 452 (79.0)                   | 247 (78.2)                | 0.765   | 0.1  |

|                                              |             |            |           |      |            |            |       |     |            |            |           |     |
|----------------------------------------------|-------------|------------|-----------|------|------------|------------|-------|-----|------------|------------|-----------|-----|
| Hemoglobin $\geq 12$ g/dL                    | 1076 (63.9) | 455 (70.9) | 0.001     | 1.1  | 119 (43.1) | 79 (51.6)  | 0.090 | 0.7 | 266 (46.5) | 151 (47.8) | 0.714     | 1.4 |
| Blood urea nitrogen $\geq 26$ mg/dL          | 608 (36.1)  | 246 (38.3) | 0.317     | 0.1  | 104 (37.7) | 50 (32.7)  | 0.301 | 1.7 | 200 (35.0) | 101 (32.0) | 0.365     | 1.9 |
| Creatinine $\geq 2$ mg/dL                    | 252 (15.0)  | 87 (13.6)  | 0.391     | 0.3  | 54 (19.6)  | 19 (12.4)  | 0.059 | 1.8 | 74 (12.9)  | 31 (9.8)   | 0.167     | 0.8 |
| BNP $> 900$ pg/mL or NTproBNP $> 5000$ pg/mL | 997 (59.2)  | 357 (55.6) | 0.120     | 0.3  | 154 (55.8) | 69 (45.1)  | 0.034 | 2.6 | 199 (34.8) | 94 (29.7)  | 0.126     | 1.4 |
| <b>Medications and device therapies</b>      |             |            |           |      |            |            |       |     |            |            |           |     |
| ACEI or ARB                                  | 1399 (83.0) | 511 (79.6) | 0.061     | 0.03 | 202 (73.2) | 106 (69.3) | 0.389 | 0.1 | 366 (64.0) | 183 (57.9) | 0.074     | 2.7 |
| Beta-blockers                                | 1132 (67.2) | 438 (68.2) | 0.631     | 0.1  | 201 (72.8) | 110 (71.9) | 0.836 | 2.4 | 307 (53.7) | 166 (52.5) | 0.745     | 0.1 |
| Aldosterone antagonist                       | 1074 (63.7) | 415 (64.6) | 0.685     | 0.6  | 142 (51.4) | 88 (57.5)  | 0.227 | 0.4 | 278 (48.6) | 173 (54.7) | 0.079     | 1.7 |
| Nitrate                                      | 981 (58.2)  | 352 (54.8) | 0.139     | 0.6  | 193 (69.9) | 96 (62.7)  | 0.129 | 3.2 | 314 (54.9) | 152 (48.1) | 0.052     | 1.1 |
| Diuretic                                     | 1608 (95.4) | 621 (96.7) | 0.163     | 0.6  | 253 (91.7) | 143 (93.5) | 0.503 | 0.2 | 526 (92)   | 303 (95.9) | 0.024     | 0.6 |
| Anticoagulant                                | 972 (57.7)  | 488 (76.0) | $< 0.001$ | 2.1  | 171 (62.0) | 99 (64.7)  | 0.572 | 2.1 | 275 (48.1) | 191 (60.4) | $< 0.001$ | 1.9 |
| Antiplatelet                                 | 1146 (68.0) | 397 (61.8) | 0.005     | 1.3  | 212 (76.8) | 109 (71.2) | 0.204 | 1.2 | 326 (57.0) | 186 (58.9) | 0.620     | 1.6 |
| Statin                                       | 839 (49.8)  | 257 (40.0) | $< 0.001$ | 2.6  | 150 (54.3) | 78 (51.0)  | 0.503 | 2.2 | 240 (42.0) | 119 (37.7) | 0.211     | 1.3 |

Continuous variables are reported as mean  $\pm$  standard deviation, and categorical variables are reported as n (%).

ACEI, Angiotensin-converting enzyme inhibitor; SR, sinus rhythm; AF, atrial fibrillation; ARB, Angiotensin receptor blockers; BNP, brain natriuretic peptide; CRT, cardiac resynchronization therapy; EF, ejection fraction; HFrEF, heart failure with reduced ejection fraction; HFmrEF, heart failure with mid-range ejection fraction; HFpEF, heart failure with preserved ejection fraction; ICD, implantable cardiac defibrillator; NT-proBNP, N-terminal prohormone of brain natriuretic peptide; NYHA, New York Heart Association; SMD, standardized mean difference.
