# Supplementary material for: Impact of atrial fibrillation in patients with heart failure and reduced, mid-range or preserved ejection fraction
Source: PubMed Central journal article supplement — Heart. 2020 Apr 27;106(15):1160–8. doi: 10.1136/heartjnl-2019-316219 (PMC7398483; doi:10.1136/heartjnl-2019-316219), 2020-04-27

**Supplementary file 5.** Kaplan-Meier curves for propensity score matched cohort. Data are stratified by the three ejection fraction groups and the presence or absence of AF for (i) all-cause mortality, (ii) all-cause mortality or rehospitalization, (iii) CVD mortality, and (iv) stroke

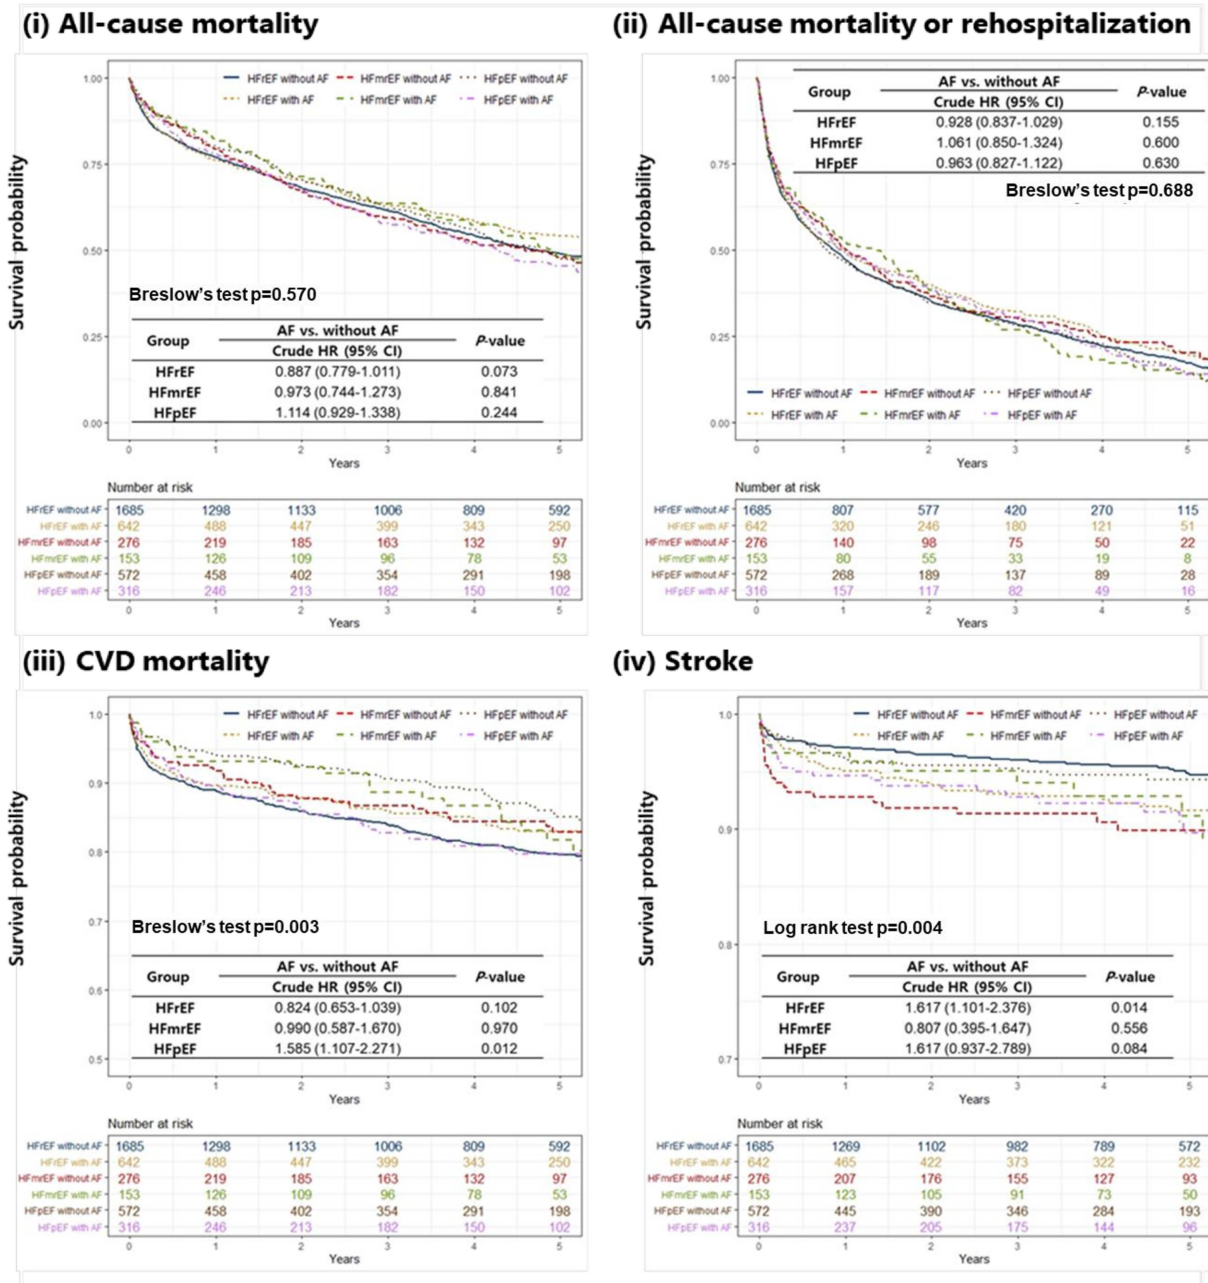

Supplement: heartjnl-2019-316219supp011.pdf [file heartjnl-2019-316219supp011.pdf]
