# Supplementary material for: Impact of atrial fibrillation in patients with heart failure and reduced, mid-range or preserved ejection fraction
Source: PubMed Central journal article supplement — Heart. 2020 Apr 27;106(15):1160–8. doi: 10.1136/heartjnl-2019-316219 (PMC7398483; doi:10.1136/heartjnl-2019-316219), 2020-04-27

**Supplementary file 6.** Kaplan-Meier curves of all-cause mortality and stroke by AF type in patients with AF for propensity score matched cohort**(A) All-cause mortality in HFrEF**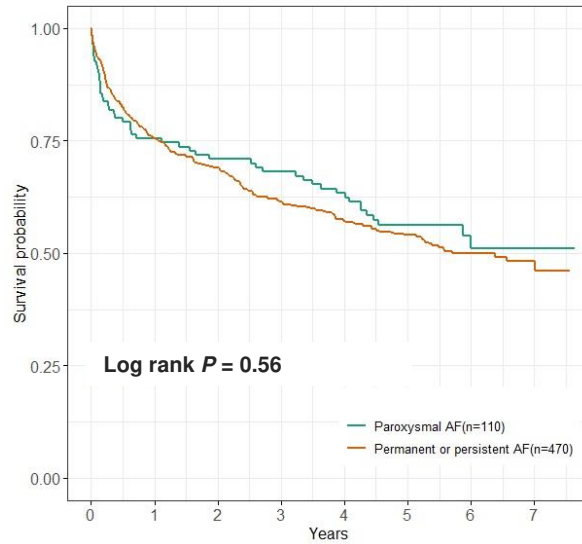**(B) All-cause mortality in HFmrEF**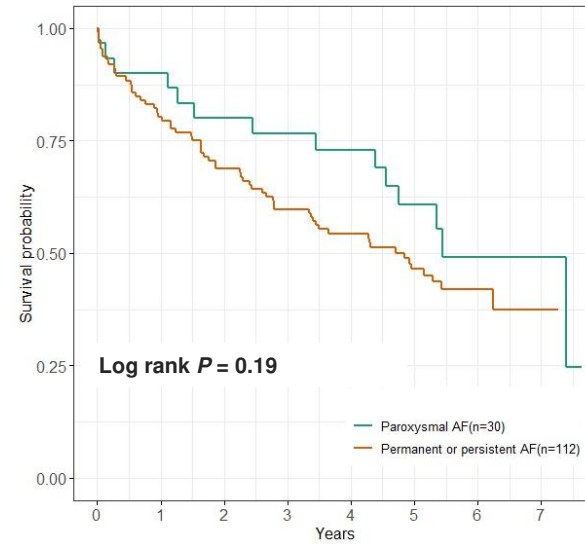**(C) All-cause mortality in HFpEF**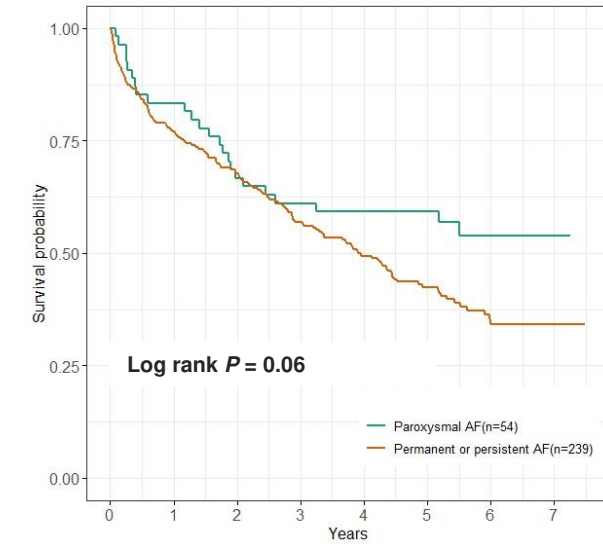**(D) Stroke in HFrEF**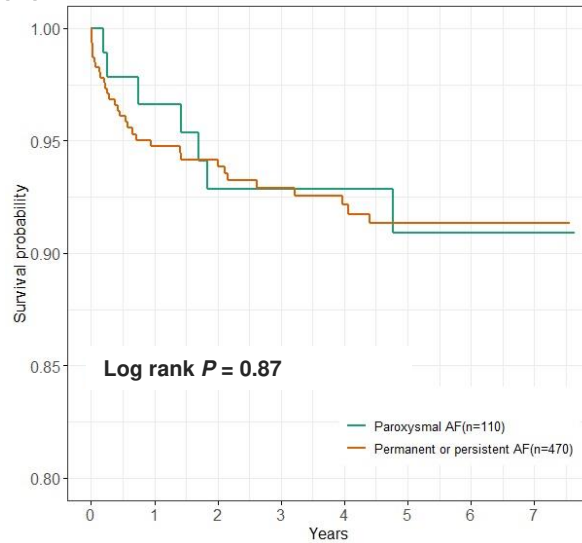**(E) Stroke in HFmrEF**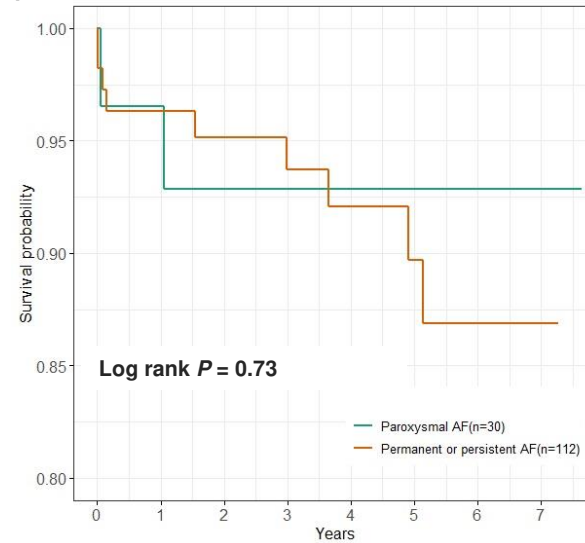**(F) Stroke in HFpEF**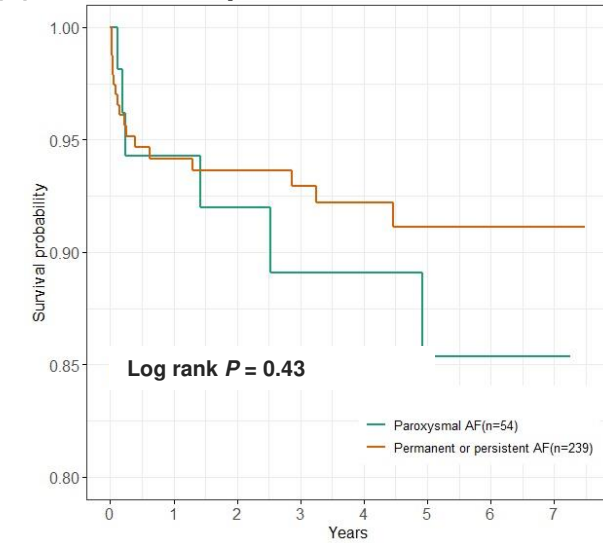

Supplement: heartjnl-2019-316219supp012.pdf [file heartjnl-2019-316219supp012.pdf]
